# Supplementary material for: Sulfonic acid-modified MOFs as heterogeneous bifunctional catalysts for ethylene oligomerization at room temperature without cocatalysts
Source: Royal Society of Chemistry journal article supplement (doi:10.1039/d4cy00502c), 2024-01-01
Supplement: d4cy00502c1.pdf [file d4cy00502c1.pdf]

## Supporting Information

### **Sulfonic acid-modified MOFs as heterogeneous bifunctional catalysts for ethylene oligomerization at room temperature without cocatalysts**

Yao Ning<sup>a,d</sup>, Yuqi Yang<sup>b,d</sup>, Dongming Shan<sup>c</sup>, Shuxing Mei<sup>\*b</sup>, Yibai Yan<sup>b</sup>, Linjie Ding<sup>b</sup>, Ying Zhang<sup>\*a</sup>

a College of New Energy and Materials, China University of Petroleum-Beijing, Beijing 102249, China.

b State Key Laboratory of Heavy Oil Processing at Karamay, China University of Petroleum-Beijing at Karamay, Karamay 834000, China.

c Shaanxi Coal Chemical Industry Technology Research Institute Co., Ltd., 710100, China

d Co-first author

\* Corresponding author E-mail: shuxingmei@cupk.edu.cn, Y.Zhang@cup.edu.cn

## 2. Figures and Tables

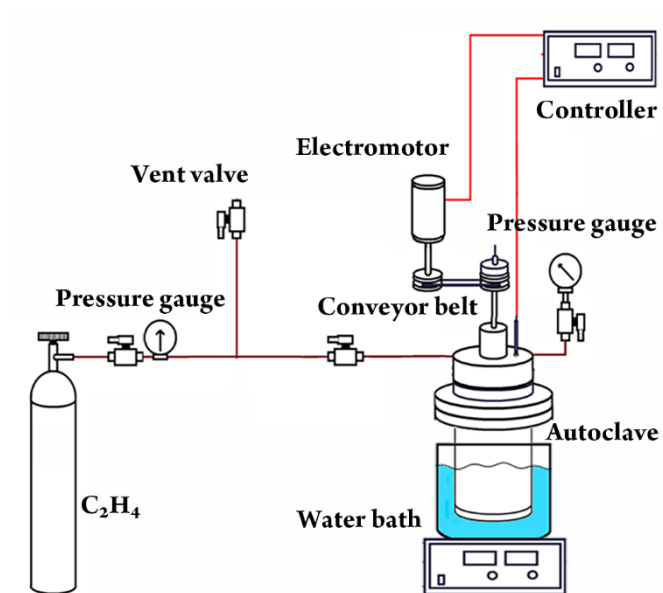

**Fig. S1.** Schematic diagram of the ethylene dimerization reactor.

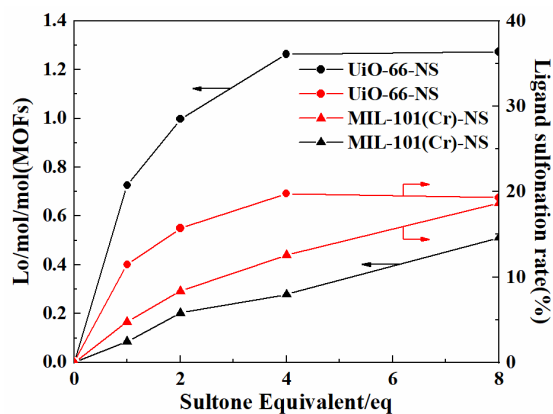

**Fig. S2.** The loading amounts and the ligand sulfonation rates of UiO-66-NS<sub>x</sub> and MIL-101(Cr)-NS<sub>x</sub>

With the increase of propanesultone equivalent, the sulfonation rate of ligands also increases. When the equivalent of propanesultone reaches 4eq, the sulfonation rate of UiO-66-NS<sub>4</sub> reaches saturation, and the maximum sulfonation rate is about 20%. The sulfonation rate of MIL-101(Cr)-NS is slower than that of UiO-66-NS. When the equivalent of propanesultone reaches 8eq, the sulfonation rate of MIL-101(Cr)-NS<sub>8</sub> is close to 20%. The coordination number of ligands on the metal center of UiO-66 is 6, while that of MIL-101 (Cr) is 3. Therefore, at the same sulfonation rate, the loading amount of UiO-66-NS in the repeating unit is twice than that of MIL-101(Cr)-NS.

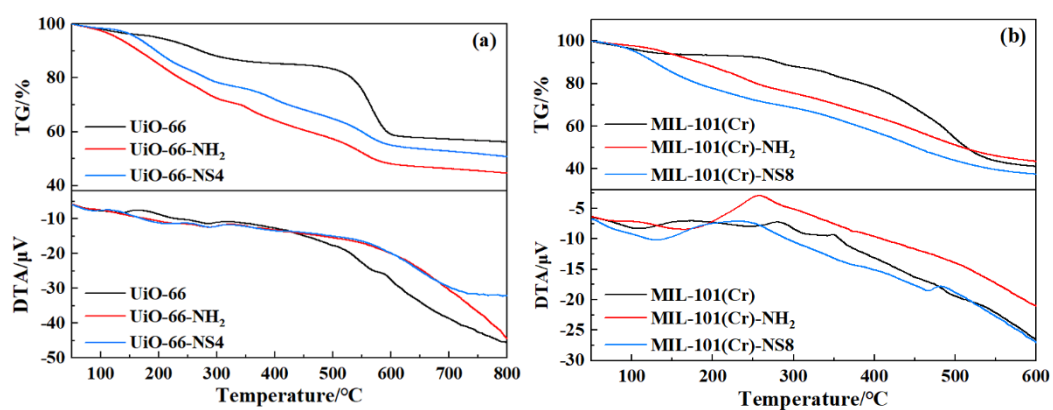

**Fig. S3.** TGA and DTA curves of (a) UiO-66-NS and (b) MIL-101(Cr)-NS.

**Table S1.** The effect of the SA concentration on catalytic performance of SA/MIL-101(Cr).<sup>a</sup>

| Cat.             | SA/% <sup>b</sup> | Activity/<br>g/(mol(cat.)·h) | Selectivity/%  |                |                  |
|------------------|-------------------|------------------------------|----------------|----------------|------------------|
|                  |                   |                              | C <sub>6</sub> | C <sub>8</sub> | C <sub>10+</sub> |
| SA               | -                 | 0                            | 0              | 0              | 0                |
| MIL-101(Cr)      | -                 | 2205                         | 38.66          | 48.59          | 12.75            |
| 10SA/MIL-101(Cr) | 10                | 11489                        | 10.16          | 67.70          | 22.15            |
| 30SA/MIL-101(Cr) | 30                | 9761                         | 4.45           | 78.51          | 17.04            |
| 50SA/MIL-101(Cr) | 50                | 8292                         | 2.04           | 88.54          | 9.42             |
| 70SA/MIL-101(Cr) | 70                | 5544                         | 0              | 77.41          | 22.59            |
| 90SA/MIL-101(Cr) | 90                | 6976                         | 7.58           | 89.52          | 2.90             |

<sup>a</sup>Reaction conditions: catalyst 10  $\mu$ mol (based on the MOFs), 25 °C, 1 MPa, 1 h, toluene as solvent, GC measurement. <sup>b</sup>The concentration of aqueous solution of SA, n(SA)/n(MIL-101(Cr)).

**Table S2.** The effect of the sultone equivalent on catalytic performance of UiO-66-NS.<sup>a</sup>

| Cat.                   | Sultone<br>equivalent/eq <sup>b</sup> | Activity/<br>g/(mol(cat.)·h) | Selectivity/%  |                |                |                  |
|------------------------|---------------------------------------|------------------------------|----------------|----------------|----------------|------------------|
|                        |                                       |                              | C <sub>4</sub> | C <sub>6</sub> | C <sub>8</sub> | C <sub>10+</sub> |
| UiO-66                 | -                                     | 940                          | 19.48          | 51.53          | 28.99          | 0                |
| UiO-66-NH <sub>2</sub> | -                                     | 943                          | 10.34          | 52.88          | 36.78          | 0                |
| UiO-66-NS1             | 1                                     | 3046                         | 0              | 23.47          | 56.38          | 20.15            |
| UiO-66-NS2             | 2                                     | 9041                         | 0              | 1.43           | 79.65          | 18.92            |
| UiO-66-NS4             | 4                                     | 13472                        | 0              | 10.11          | 68.01          | 21.88            |
| UiO-66-NS8             | 8                                     | 11105                        | 0              | 2.56           | 63.82          | 33.62            |

<sup>a</sup>Reaction conditions: catalyst 10 μmol (based on the MOFs), 25 °C, 1 MPa, 1 h, toluene as solvent, GC measurement. <sup>b</sup>The concentration of aqueous solution of 1,3-propanesultone, n(sultone)/n(UiO-66-NH<sub>2</sub>).

**Table S3.** The effect of the sultone equivalent on catalytic performance of MIL-101(Cr)-NS.<sup>a</sup>

| Cat.                        | Sultone<br>equivalent/eq | Activity/<br>g/(mol(cat.)·h) | Selectivity/%  |                |                  |
|-----------------------------|--------------------------|------------------------------|----------------|----------------|------------------|
|                             |                          |                              | C <sub>6</sub> | C <sub>8</sub> | C <sub>10+</sub> |
| MIL-101(Cr)                 | -                        | 2205                         | 38.66          | 48.59          | 1275             |
| MIL-101(Cr)-NH <sub>2</sub> | -                        | 2485                         | 39.77          | 32.40          | 27.83            |
| MIL-101(Cr)-NS1             | 1                        | 2212                         | 3.86           | 96.14          | 0                |
| MIL-101(Cr)-NS2             | 2                        | 2620                         | 16.87          | 83.13          | 0                |
| MIL-101(Cr)-NS4             | 4                        | 4211                         | 7.67           | 68.63          | 23.70            |
| MIL-101(Cr)-NS8             | 8                        | 9010                         | 27.14          | 43.43          | 29.43            |

<sup>a</sup>Reaction conditions: catalyst 10 μmol (based on the MOFs), 25 °C, 1 MPa, 1 h, toluene as solvent, GC measurement. <sup>b</sup>The concentration of aqueous solution of 1,3-propanesultone, n(sultone)/n(MIL-101(Cr)-NH<sub>2</sub>).

**Table S4.** The effects of the reaction temperature and the ethylene pressure on catalytic performance of SA/MIL-101(Cr).<sup>a</sup>

| Reaction temperature/°C | Ethylene pressure/MPa | Activity/<br>g/(mol(cat.)·h) | Selectivity/%  |                |                  |
|-------------------------|-----------------------|------------------------------|----------------|----------------|------------------|
|                         |                       |                              | C <sub>6</sub> | C <sub>8</sub> | C <sub>10+</sub> |
| 25                      | 0.5                   | 16127                        | 2.95           | 48.31          | 48.75            |
| 25                      | 1                     | 11489                        | 10.16          | 67.70          | 22.15            |
| 25                      | 1.5                   | 3413                         | 0              | 74.40          | 25.6             |
| 15                      | 1                     | 21953                        | 3.42           | 70.32          | 26.26            |
| 35                      | 1                     | 7501                         | 19.48          | 57.69          | 22.83            |

<sup>a</sup>Reaction conditions: catalyst: 10SA/MIL-101(Cr), 10 μmol (based on the MOFs), 1 h, toluene as solvent, GC measurement.



**Table S5.** The effects of the reaction temperature and the ethylene pressure on catalytic performance of UiO-66-NS.<sup>a</sup>

| Reaction temperature/°C | Ethylene pressure/MPa | Activity g/(mol(cat.)·h) | Selectivity/%  |                |                  |
|-------------------------|-----------------------|--------------------------|----------------|----------------|------------------|
|                         |                       |                          | C <sub>6</sub> | C <sub>8</sub> | C <sub>10+</sub> |
| 15                      | 1                     | 980                      | 46.60          | 44.62          | 8.78             |
| 20                      | 1                     | 1197                     | 29.32          | 64.62          | 5.76             |
| 25                      | 1                     | 13472                    | 10.11          | 68.01          | 21.88            |
| 30                      | 1                     | 7923                     | 1.81           | 25.19          | 73.00            |
| 35                      | 1                     | 2977                     | 13.05          | 13.70          | 73.25            |
| 25                      | 0.5                   | 3665                     | 6.87           | 91.55          | 1.58             |
| 25                      | 0.75                  | 7406                     | 1.66           | 72.29          | 26.05            |
| 25                      | 1.25                  | 20853                    | 3.79           | 24.69          | 71.52            |
| 25                      | 1.5                   | 25128                    | 4.37           | 5.53           | 90.10            |

<sup>a</sup>Reaction conditions: catalyst: UiO-66-NS4, 10  $\mu$ mol (based on the MOFs), 1 h, toluene as solvent, GC measurement.

**Table S6.** The effects of the reaction temperature and the ethylene pressure on catalytic performance of MIL-101(Cr)-NS.<sup>a</sup>

| Reaction temperature/°C | Ethylene pressure/MPa | Activity/<br>g/(mol(cat.)·h) | Selectivity/%  |                |                  |
|-------------------------|-----------------------|------------------------------|----------------|----------------|------------------|
|                         |                       |                              | C <sub>6</sub> | C <sub>8</sub> | C <sub>10+</sub> |
| 15                      | 1                     | 1103                         | 92.26          | 0              | 7.74             |
| 20                      | 1                     | 4486                         | 11.94          | 40.49          | 47.57            |
| 30                      | 1                     | 6095                         | 3.28           | 91.66          | 5.07             |
| 25                      | 1                     | 9010                         | 27.14          | 43.43          | 29.43            |
| 35                      | 1                     | 775                          | 18.30          | 79.11          | 2.58             |
| 25                      | 0.5                   | 248                          | 28.66          | 71.34          | 0                |
| 25                      | 0.75                  | 1896                         | 32.98          | 45.77          | 21.26            |
| 25                      | 1.25                  | 9466                         | 10.15          | 2.58           | 87.27            |
| 25                      | 1.5                   | 17353                        | 2.58           | 25.66          | 71.76            |

<sup>a</sup>Reaction conditions: catalyst: MIL-101(Cr)-NS8, 10 μmol (based on the MOFs), 1 h, toluene as solvent, GC measurement.

**Table S7.** The effects of the reaction time on catalytic performance of SA/MIL-101(Cr).<sup>a</sup>

| Reaction time/h | Activity/g/(mol(cat.)·h) | Selectivity/%  |                |                  |
|-----------------|--------------------------|----------------|----------------|------------------|
|                 |                          | C <sub>6</sub> | C <sub>8</sub> | C <sub>10+</sub> |
| 0.5             | 9847                     | 1.99           | 72.61          | 25.40            |
| 1               | 11489                    | 10.16          | 67.70          | 22.15            |
| 1.5             | 2599                     | 9.42           | 29.06          | 61.53            |

<sup>a</sup>Reaction conditions: catalyst: 10SA/MIL-101(Cr), 10 μmol (based on the MOFs), 25 °C, 1 MPa, toluene as solvent, GC measurement.

**Table S8.** The effects of the reaction time on catalytic performance of UiO-66-NS.<sup>a</sup>

| Reaction time/h | Activity g/(mol(cat.)·h) | Selectivity/%  |                |                |                  |
|-----------------|--------------------------|----------------|----------------|----------------|------------------|
|                 |                          | C <sub>4</sub> | C <sub>6</sub> | C <sub>8</sub> | C <sub>10+</sub> |
| 0.5             | 14610                    | 90.76          | 0.15           | 6.90           | 2.19             |
| 1               | 13472                    | 0              | 10.11          | 68.01          | 21.88            |
| 1.5             | 15184                    | 0              | 0              | 30.73          | 69.27            |
| 2               | 2101                     | 0              | 29.16          | 30.05          | 40.79            |

<sup>a</sup>Reaction conditions: catalyst: UiO-66-NS4, 10 μmol (based on the MOFs), 25 °C, 1 MPa, toluene as solvent, GC measurement.

**Table S9.** The effects of the reaction time on catalytic performance of MIL-101(Cr)-NS.<sup>a</sup>

| Reaction time/h | Activity/g/(mol(cat.)·h) | Selectivity/%  |                |                  |
|-----------------|--------------------------|----------------|----------------|------------------|
|                 |                          | C <sub>6</sub> | C <sub>8</sub> | C <sub>10+</sub> |
| 0.5             | 11370                    | 32.10          | 61.23          | 6.67             |
| 1               | 9010                     | 27.14          | 43.43          | 29.43            |
| 1.5             | 9527                     | 3.93           | 8.28           | 87.79            |
| 2               | 7583                     | 4.73           | 4.73           | 90.53            |

<sup>a</sup>Reaction conditions: catalyst: MIL-101(Cr)-NS8, 10 μmol (based on the MOFs), 25 °C, 1 MPa, toluene as solvent, GC measurement.

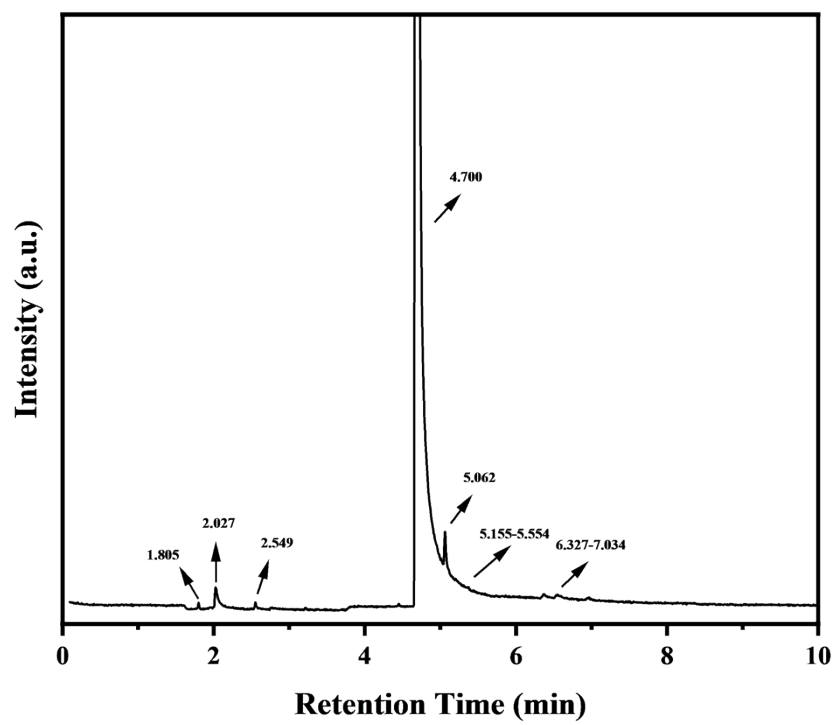

**Fig. S4.** GC of the ethylene oligomerization products

**Table S10.** Retention time corresponds to the substance

| Enter | Retention Time/min | Substance       |
|-------|--------------------|-----------------|
| 1     | 1.805              | Ethylene        |
| 2     | 2.027              | Ethanol         |
| 3     | 2.549              | Hexene (C6)     |
| 4     | 4.700              | Toluene         |
| 5     | 5.062              | 1-Octene (1-C8) |
| 6     | 5.155-5.554        | Octene isomer   |
| 7     | 6.327-7.034        | C10+            |

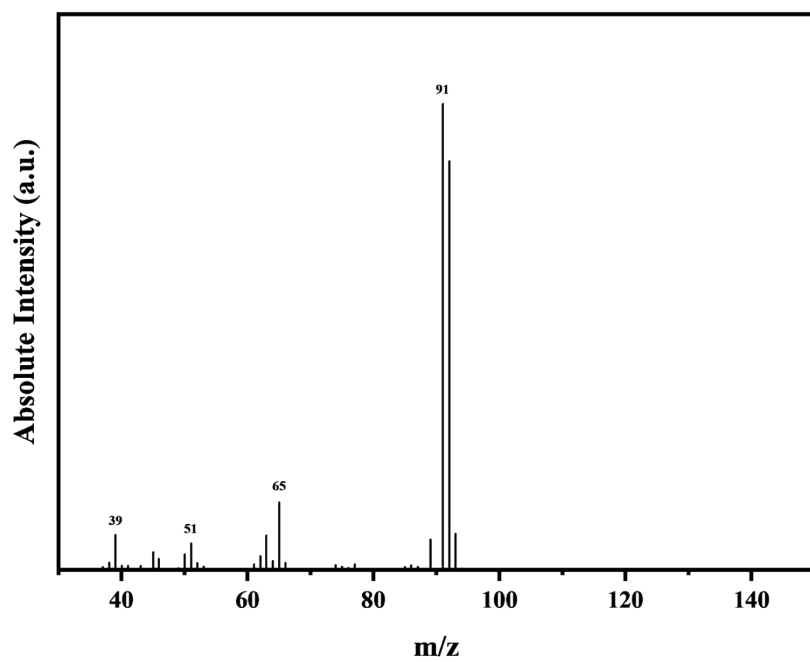

Fig. S5. Mass spectrum at the retention time of 4.700 min



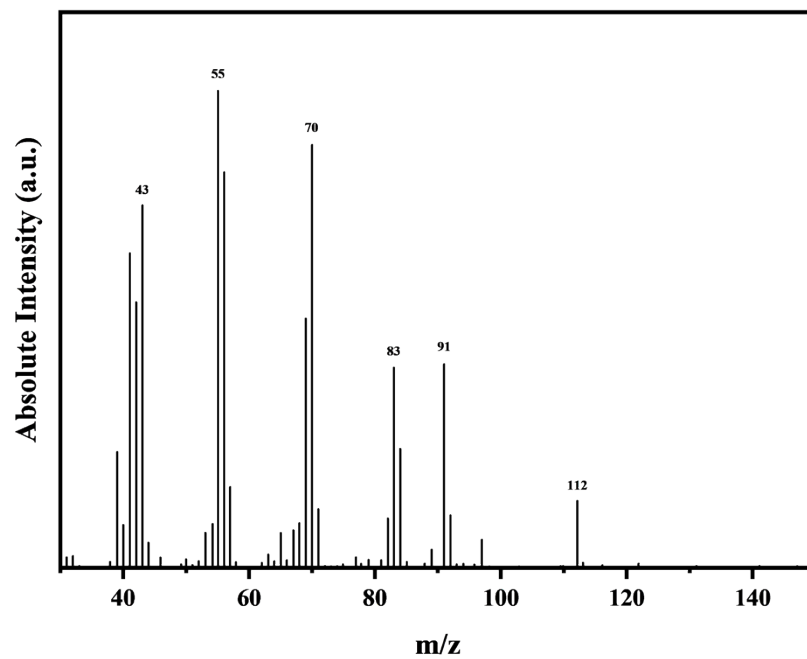

Fig. S6. Mass spectrum at the retention time of 5.062 min
